# Supplementary material for: Multi‐dimensional analysis identifies an immune signature predicting response to decitabine treatment in elderly patients with AML
Source: PubMed Central journal article supplement — Br J Haematol. 2019 Oct 1;188(5):674–84. doi: 10.1111/bjh.16228 (PMC7065206; doi:10.1111/bjh.16228), 2019-10-01
Supplement: BJH-188-674-s001.pdf [file BJH-188-674-s001.pdf]

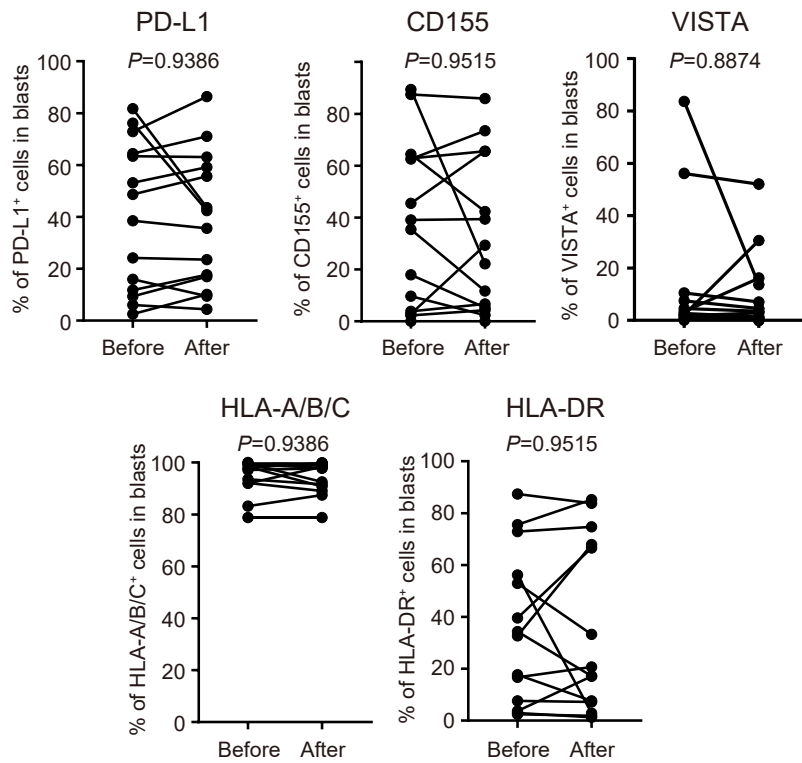

**Fig S1. Expression of surface markers on circulating AML blasts before and after decitabine treatment.** PBMCs from AML patients (n=14) before and after treatment were analyzed by flow cytometry. The frequencies of PD-L1, CD155, VISTA, HLA-A/B/C and HLA-DR on AML blasts are shown. All *p*-values were calculated using Wilcoxon signed-rank tests and were corrected for the multiple comparison using the Benjamini-Hochberg adjustment.

A

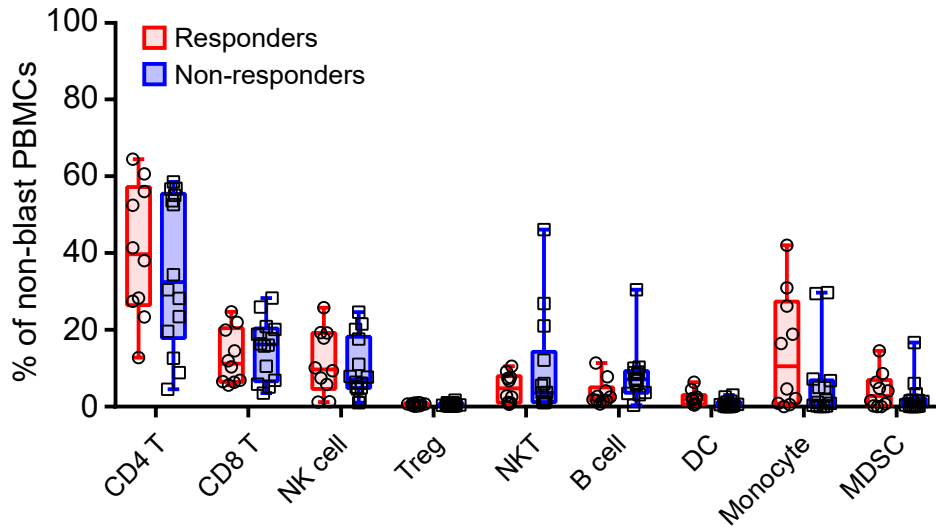

B

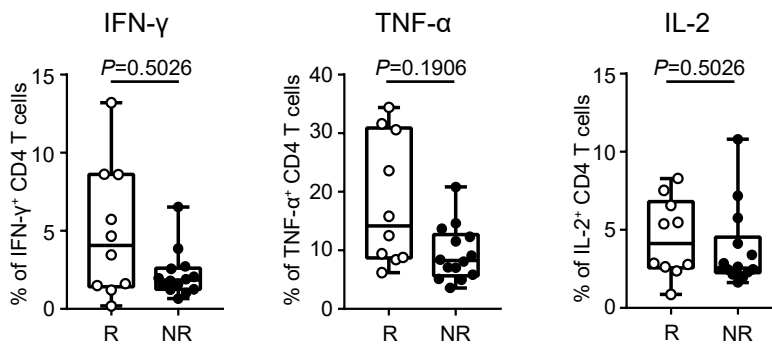

**Fig S2.** (A) Box-and-whisker plots show the frequency of immune cell subsets in the non-blast PBMCs between responders (circle, red,  $n=10$ ) and non-responders (square, blue,  $n=14$ ) of decitabine treatment each circle or square represents the data of an individual patient. (B) Cytokine production of CD4 T cells from responders ( $n=10$ ) or non-responders ( $n=14$ ) upon in vitro stimulation with anti-CD3 and anti-CD28 antibodies. All  $p$ -values were calculated using Wilcoxon-rank sum test and were corrected for the multiple comparison using the Benjamini-Hochberg adjustment. For B, total of 26 immune markers were tested on CD4 T cells and adjusted for multiple comparison. The numbers shown here indicate adjusted  $p$ -values.

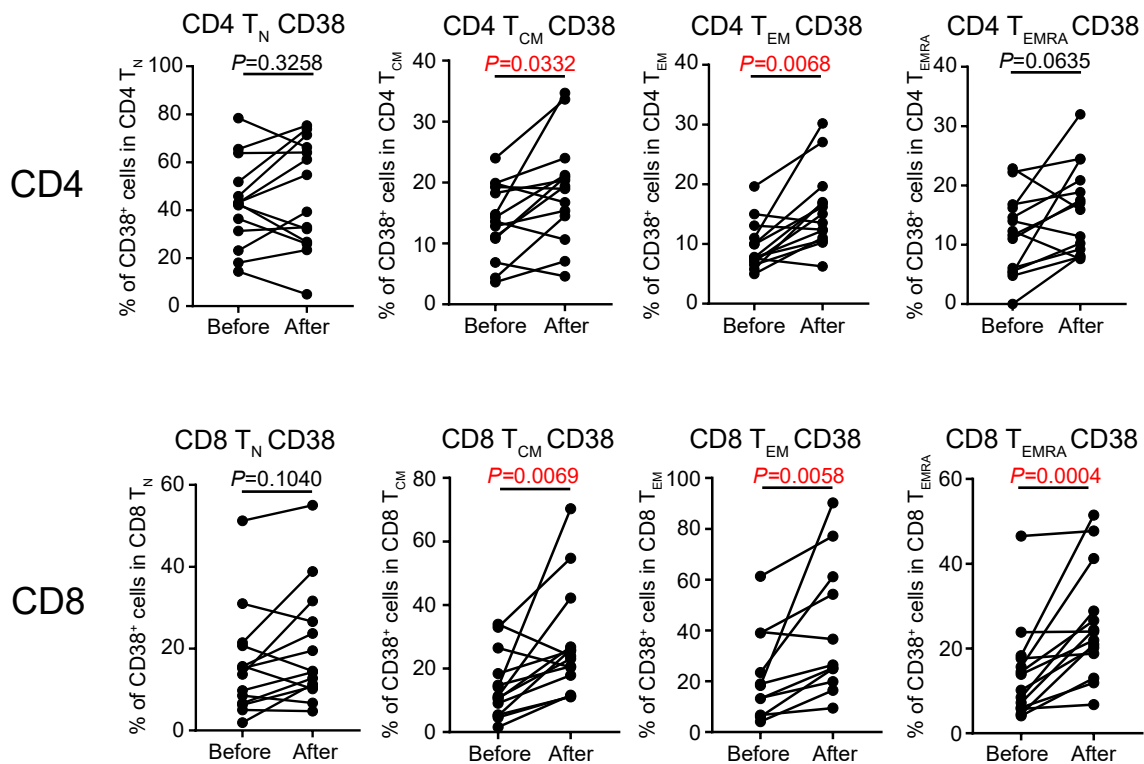

**Fig S3. The expression of CD38 on each subpopulation of T cells in patients before and after decitabine treatment.** PBMCs from patients ( $n=14$ ) before and after treatment were analyzed by flow cytometry. The frequencies of CD38+ cells in CD4 or CD8 T cells are shown. All  $p$ -values were calculated using Wilcoxon signed-rank tests and were corrected for the multiple comparison using the Benjamini-Hochberg adjustment. The numbers shown here indicate adjusted  $p$ -values.

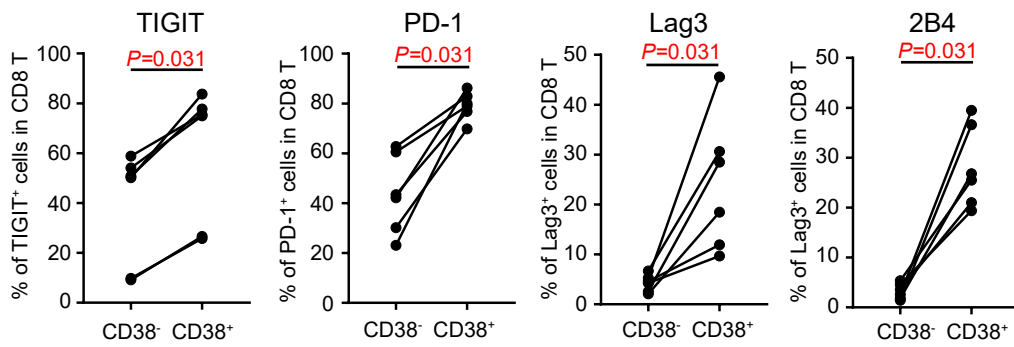

**Fig S4. Expression of co-inhibitory molecules on CD38<sup>+</sup> CD8 T cells.** PBMCs from AML patients (n=6) at initial diagnosis were examined by flow cytometry. The frequencies of TIGIT, PD-1, Lag3 and 2B4 on CD38<sup>-/+</sup> CD8 T cells are shown. All  $p$ -values were calculated using Wilcoxon signed-rank tests and were corrected for the multiple comparison using the Benjamini-Hochberg adjustment. The numbers shown here indicate adjusted  $p$ -values.

**Table S1. Patients' characteristics.**

| Patient ID | Age/Sex | Risk stratification | WBC × 10 <sup>9</sup> /L | PB Blast % | Platelet × 10 <sup>9</sup> /L | PS | Treatment regimen | Response | Time to response | Comorbidities                                                 |
|------------|---------|---------------------|--------------------------|------------|-------------------------------|----|-------------------|----------|------------------|---------------------------------------------------------------|
| 1          | 71/F    | adverse             | 13.1                     | 10.6       | 32                            | 1  | 10-day            | SD       | N/A              | Hypertension, Hypothyroid, GERD                               |
| 2          | 71/M    | adverse             | 1.39                     | 0.0        | 57                            | 2  | 5-day             | SD       | N/A              | Diabetes, Chronic renal failure, Hypertension                 |
| 3          | 74/M    | intermediate        | 2.66                     | 24.2       | 72                            | 1  | 10-day            | PR       | N/A              | Salivary gland tumor, TIA                                     |
| 4          | 79/M    | adverse             | 6.04                     | 38.7       | 165                           | 3  | 5-day             | CR       | 4 months         | Cardiac artery disease, Chronic renal failure, Diabetes, COPD |
| 5          | 71/F    | adverse             | 5.85                     | 19         | 42                            | 1  | 5-day             | PR       | N/A              | Essential thrombocythemia, Renal failure, Hypertension        |
| 6          | 69/F    | adverse             | 6.3                      | 34.1       | 67                            | 2  | 10-day            | PD       | N/A              | Hypertension                                                  |
| 7          | 64/M    | adverse             | 5.32                     | 36.8       | 128                           | 3  | 5-day             | PD       | N/A              | Renal cell carcinoma s/p nephrectomy, Chronic renal failure   |
| 8          | 78/M    | intermediate        | 12.2                     | 0.0        | 44                            | 2  | 5-day             | CR       | 4 months         | Coronary artery disease, Diabetes, A-Fib, Aortic stenosis     |
| 9          | 67/F    | intermediate        | 14.73                    | 74.1       | 31                            | 1  | 5-day             | CR       | 3 months         | Neuroendocrine tumor, Ovarian cancer, Hypertension            |
| 10         | 52/M    | adverse             | 8.64                     | 5.9        | 10                            | 1  | 5-day             | CRi      | 4 months         | HCV hepatitis, GI bleeding                                    |
| 11         | 77/F    | adverse             | 2.57                     | 53.8       | 38                            | 1  | 5-day             | SD       | N/A              | Hypertension                                                  |
| 12         | 69/F    | intermediate        | 4.36                     | 0.0        | 110                           | 1  | 10-day            | CR       | 2 months         | Hypertension                                                  |
| 13         | 67/F    | intermediate        | 4.1                      | 0.0        | 198                           | 1  | 5-day             | N/A      | N/A              | Cardiomyopathy                                                |
| 14         | 67/F    | adverse             | 109.96                   | 93.5       | 155                           | 2  | 5-day             | N/A      | N/A              | Diastolic heart failure, Morbid obesity                       |

\*Risk stratification and response criteria is per the ELN 2017 recommendation.

\*\*Abbreviation: PB, peripheral blood; PS, ECOG performance status; CR, complete remission; CRi, incomplete hematological recovery; PR, partial remission; SD, stable disease; PD, progressive disease; N/A, not available.

**Table S2. Patients' molecular genetics.**

| Patient ID | Karyotype                           | FISH      | Mutations                                |
|------------|-------------------------------------|-----------|------------------------------------------|
| 1          | normal                              | negative  | ASXL1, SRSF2, TET2, NRAS, CEBPA (single) |
| 2          | N/A                                 | 5q-, tri8 | TP53                                     |
| 3          | 46,XY,add(20)(q11.2)[6]/46,XY[14]   | negative  | IDH2                                     |
| 4          | complex                             | 5q-, tri8 | N/A                                      |
| 5          | complex                             | negative  | N/A                                      |
| 6          | 47,XX,del(11)(q21q23),+13[20]       | negative  | BCOR, RUNX1, SRSF2                       |
| 7          | complex                             | MLL-KMT2A | ASXL1, PTPN11                            |
| 8          | normal                              | negative  | FIt-3 ITD, DNMT3A, NPM-1                 |
| 9          | 46,XX,del(11)(p13),add(11)(q13)[20] | MLL-KMT2A | WT-1, CEBPA                              |
| 10         | normal                              | negative  | ASXL1, RUNX1, NRAS                       |
| 11         | normal                              | negative  | FIt-3 ITD, IDH1, STAG2                   |
| 12         | 46,XX, t(3;8)(p25;23)[7]/46,XX[13]. | negative  | SF3B1, WT-1                              |
| 13         | normal                              | negative  | DNMT3A, IDH1, FIt-3 TKD, and NPM-1       |
| 14         | complex                             | negative  | DNMT3A, RUNX1, TP53                      |

\*Abbreviation: N/A, not available.

**Table S3. Staining panels for flow cytometry.**

Panel 1-5 for T cells, 6-7 for NK cells, 8 for other immune cells and 9 for cell components.

| Panel 1 |          |             | Panel 2 |         |           | Panel 3 |          |             | Panel 4 |        |           | Panel 5  |        |             |
|---------|----------|-------------|---------|---------|-----------|---------|----------|-------------|---------|--------|-----------|----------|--------|-------------|
| Antigen | Clone    | Company     | Antigen | Clone   | Company   | Antigen | Clone    | Company     | Antigen | Clone  | Company   | Antigen  | Clone  | Company     |
| CD3     | SK7      | BD          | CD3     | SK7     | BD        | CD3     | SK7      | BD          | CD3     | SK7    | BD        | CD3      | SK7    | BD          |
| CD4     | SK3      | BD          | CD4     | SK3     | BD        | CD4     | SK3      | BD          | CD4     | SK3    | BD        | CD4      | SK3    | BD          |
| CD8     | SK1      | BD          | CD8     | SK1     | BD        | CD8     | SK1      | BD          | CD8     | SK1    | BD        | CD8      | SK1    | BD          |
| CD45RA  | HI100    | BD          | CD45RA  | HI100   | BD        | CD45RA  | HI100    | BD          | CD45RA  | HI100  | BD        | CD45RA   | HI100  | BD          |
| CCR7    | G043H7   | BioLegend   | CCR7    | G043H7  | BioLegend | CCR7    | G043H7   | BioLegend   | CCR7    | G043H7 | BioLegend | CCR7     | G043H7 | BioLegend   |
| FoxP3   | 259D/C7  | BD          | CD160   | BY55    | BD        | ICOS    | ISA3     | eBioscience | CD19    | HIB19  | BD        | Ki67     | B56    | BD          |
| CD226   | 11A8     | BioLegend   | 2B4     | C1.7    | BioLegend | 4-1BB   | 4B4-1    | BD          | CD20    | 2H7    | BD        | Eomes    | WD1928 | eBioscience |
| TIGIT   | MBSA43   | eBioscience | CTLA4   | BNI3    | BD        | GITR    | eBioA1TR | eBioscience | CD38    | HIT2   | BD        | T-bet    | O4-46  | BD          |
| PD-1    | EH12.2H7 | BioLegend   | LAG3    | 874501  | R&D       | OX40    | ACT35    | BD          | CD69    | FN50   | BD        | GrzmB    | GB11   | BD          |
| Tim3    | F382E2   | BioLegend   | BTLA    | J168540 | BD        | CD28    | CD28.2   | BioLegend   |         |        |           | Perforin | dG9    | BioLegend   |

| Panel 6   |          |             | Panel 7  |          |             |
|-----------|----------|-------------|----------|----------|-------------|
| Antigen   | Clone    | Company     | Antigen  | Clone    | Company     |
| CD45      | HI30     | BD          | CD45     | HI30     | BD          |
| CD3       | SK7      | BD          | CD3      | SK7      | BD          |
| CD56      | NCAM16.2 | BD          | CD56     | NCAM16.2 | BD          |
| CD16      | 3G8      | BD          | CD16     | 3G8      | BD          |
| KIR-NKAT2 | DX27     | BD          | Tim3     | F382E2   | BioLegend   |
| CD158     | HP-MA4   | BioLegend   | Ki67     | B56      | BD          |
| CD57      | QA17A04  | BioLegend   | Eomes    | WD1928   | eBioscience |
| NKG2A     | 131411   | R&D         | T-bet    | O4-46    | BD          |
| TIGIT     | MBSA43   | eBioscience | GrzmB    | GB11     | BD          |
| PD-1      | EH12.2H7 | BioLegend   | Perforin | dG9      | BioLegend   |
| CD160     | BY55     | BD          |          |          |             |

| Panel 8 |          |           |
|---------|----------|-----------|
| Antigen | Clone    | Company   |
| CD45    | HI30     | BD        |
| Lineage |          |           |
| CD3     | SK7      | BD        |
| CD19    | HIB19    | BD        |
| CD20    | 2H7      | BD        |
| CD56    | NCAM16.2 | BD        |
| CD33    | P67.6    | BioLegend |
| CD34    | 581      | BD        |
| CD11b   | ICRF44   | BD        |
| CD14    | MΦP9     | BD        |
| HLA-ABC | G46-2.6  | BD        |
| HLA-DR  | G46-6    | BD        |
| Vista   | 730804   | R&D       |
| CD155   | SKII.4   | BioLegend |
| PD-L1   | MIH1     | BD        |

| Panel 9 |          |         |
|---------|----------|---------|
| Antigen | Clone    | Company |
| CD45    | HI30     | BD      |
| CD3     | SK7      | BD      |
| CD4     | SK3      | BD      |
| CD8     | SK1      | BD      |
| CD19    | HIB19    | BD      |
| CD20    | 2H7      | BD      |
| CD56    | NCAM16.2 | BD      |
| FoxP3   | 259D/C7  | BD      |
| CD14    | MΦP9     | BD      |
| CD11b   | ICRF44   | BD      |
| HLA-DR  | G46-6    | BD      |

**Table S4. Identification of immune cell populations.**

| Cell populations  | Identifiers       |                     |                       |                      |                     |
|-------------------|-------------------|---------------------|-----------------------|----------------------|---------------------|
| CD4 T             | CD3 <sup>+</sup>  | CD4 <sup>+</sup>    |                       |                      |                     |
| CD8 T             | CD3 <sup>+</sup>  | CD8 <sup>+</sup>    |                       |                      |                     |
| T <sub>N</sub>    | CD3 <sup>+</sup>  | CD4/8 <sup>+</sup>  | CD45RA <sup>+</sup>   | CCR7 <sup>+</sup>    |                     |
| T <sub>CM</sub>   | CD3 <sup>+</sup>  | CD4/8 <sup>+</sup>  | CD45RA <sup>-</sup>   | CCR7 <sup>+</sup>    |                     |
| T <sub>EM</sub>   | CD3 <sup>+</sup>  | CD4/8 <sup>+</sup>  | CD45RA <sup>-</sup>   | CCR7 <sup>-</sup>    |                     |
| T <sub>EMRA</sub> | CD3 <sup>+</sup>  | CD4/8 <sup>+</sup>  | CD45RA <sup>+</sup>   | CCR7 <sup>-</sup>    |                     |
| Resting Treg      | CD3 <sup>+</sup>  | CD4 <sup>+</sup>    | CD45RA <sup>+</sup>   | FoxP3 <sup>low</sup> |                     |
| Activated Treg    | CD3 <sup>+</sup>  | CD4 <sup>+</sup>    | CD45RA <sup>-</sup>   | FoxP3 <sup>hi</sup>  |                     |
| B cell            | CD3 <sup>-</sup>  | CD19 <sup>+</sup>   | CD20 <sup>+</sup>     |                      |                     |
| NK cell           | CD3 <sup>-</sup>  | CD56 <sup>+</sup>   |                       |                      |                     |
| mature NK         | CD3 <sup>-</sup>  | CD56 <sup>int</sup> | CD16 <sup>+</sup>     |                      |                     |
| immature NK       | CD3 <sup>-</sup>  | CD56 <sup>hi</sup>  | CD16 <sup>dim/-</sup> |                      |                     |
| NKT cell          | CD3 <sup>+</sup>  | CD56 <sup>+</sup>   |                       |                      |                     |
| Monocyte          | CD45 <sup>+</sup> | Lin <sup>-</sup>    | CD11b <sup>+</sup>    | CD14 <sup>+</sup>    |                     |
| MDSCs             | CD45 <sup>+</sup> | Lin <sup>-</sup>    | CD11b <sup>+</sup>    | CD33 <sup>+</sup>    | HLA-DR <sup>-</sup> |
| DC                | CD45 <sup>+</sup> | Lin <sup>-</sup>    | CD14 <sup>-</sup>     | HLA-DR <sup>+</sup>  |                     |

Lin: lineage markers CD3, CD19/20 and CD56



**Table S5. T cell immune markers tested in Figure 2 and Figure 4**

| <b>Immune markers</b> |
|-----------------------|
| ICOS                  |
| CD28                  |
| 4-1BB                 |
| OX40                  |
| GITR                  |
| CD226                 |
| CD69                  |
| CD38                  |
| TIGIT                 |
| PD-1                  |
| Tim-3                 |
| Lag-3                 |
| CTLA-4                |
| CD160                 |
| BTLA                  |
| 2B4                   |
| T-bet                 |
| Eomes                 |
| Ki67                  |
| IFN- $\gamma$         |
| TNF- $\alpha$         |
| IL-2                  |
| IL-10                 |
| TGF- $\beta$          |
| Granzyme B            |
| Perforin              |
